# Supplementary material for: Investigating the Pretreatment miRNA Expression Patterns of Advanced Hepatocellular Carcinoma Patients in Association with Response to TACE Treatment
Source: Hindawi journal article supplement (doi:10.1155/2015/649750), 2015-01-01
Supplement: f1 [file 649750.f1.pdf]

## Supplementary data

**Supplementary table 1: Profiling of 94 miRNA expression in HCC patients compared to normal liver.** Shown are mean fold of change for each miRNA normalized against the internal control. Values were compared between normal and tumour samples using Mann-Whitney statistical test.

| miRNA        | Normal (mean) | Tumour (Mean) | Tumour/Normal | Mann-Whitney( p value) |
|--------------|---------------|---------------|---------------|------------------------|
| miR-let-7a-1 | 1.733766117   | 4.302558838   | 2.481625863   | ns                     |
| miR-let-7g-2 | 0.296638009   | 2.252281983   | 7.592695183   | 0.0001                 |
| miR-9-1      | 0.161966999   | 0.070671683   | -2.291823153  | ns                     |
| miR-9*-1     | 0.003552264   | 0.002933475   | -1.210940687  | ns                     |
| miR-10a-1    | 0.072384589   | 0.81570989    | 11.26910988   | 0.0018                 |
| miR-15a-1    | 0.575112776   | 0.924256083   | 1.607086682   | ns                     |
| miR-16-1     | 2.230926661   | 11.90016725   | 5.334181289   | 0.0083                 |
| miR-18a-1    | 0.041269105   | 0.164375891   | 3.983025389   | ns                     |
| miR-18b-1    | 0.032962846   | 0.109724892   | 3.328744519   | ns                     |
| miR-21-2     | 1.457822407   | 46.12126332   | 31.63709317   | 0.0001                 |
| miR-23a-1    | 2.800671302   | 9.833495815   | 3.511120997   | 0.0062                 |
| miR-24-1     | 0.811616019   | 3.832645082   | 4.722239327   | 0.0062                 |
| miR-26a-1    | 0.080422063   | 1.574095195   | 19.57292722   | 0.0007                 |
| miR-27a-1    | 0.251003154   | 1.697866489   | 6.76432332    | 0.0016                 |
| miR-29a-1    | 12.15460972   | 6.289995043   | -1.932371907  | ns                     |
| miR-29c-1    | 6.290256719   | 9.715823886   | 1.544583046   | ns                     |
| miR-30c-2    | 2.897723006   | 7.600443391   | 2.622901974   | 0.0352                 |
| miR-30e-1    | 1.048085005   | 4.415497424   | 4.212919183   | 0.014                  |
| miR-31-1     | 0.008212886   | 0.0234246     | 2.852176292   | 0.0433                 |
| miR-34a-1    | 0.059472455   | 3.402621436   | 57.21340114   | 0.0007                 |
| miR-92b*-2   | 0.012174817   | 0.021253402   | 1.745685592   | ns                     |
| miR-93-1     | 6.756097398   | 2.230931667   | -3.02837487   | ns                     |
| miR-95-2     | 0.048176754   | 0.104436842   | 2.16778495    | ns                     |
| miR-98-1     | 0.009576793   | 0.148619057   | 15.51866622   | 0.0007                 |
| miR-99a-1    | 0.81862938    | 4.047828313   | 4.944640897   | 0.0024                 |
| miR-100-1    | 0.570381412   | 3.381369817   | 5.928260885   | 0.0033                 |
| miR-105-1    | 0.029104262   | 0.003669802   | 0.126091556   | ns                     |
| miR-106a-1   | 0.405346374   | 2.034472208   | 5.019095619   | 0.0227                 |
| miR-106b-1   | 0.250965908   | 2.069964377   | 8.247990316   | 0.0016                 |
| miR-107-1    | 0.914187278   | 6.112901157   | 6.686705562   | 0.0033                 |
| miR-122a-1   | 23.00685289   | 239.2203639   | 10.39778735   | 0.0003                 |
| miR-125b-1   | 2.002917885   | 9.95558003    | 4.970538285   | 0.0024                 |
| miR-126-1    | 1.789850257   | 15.3335566    | 8.566949407   | 0.0004                 |
| miR-130a-1   | 0.194321319   | 2.214724311   | 11.39722763   | 0.0011                 |
| miR-133b-1   | 0.05858371    | 0.016169437   | -3.623113721  | 0.0062                 |
| miR-134-1    | 0.003754056   | 0.006541087   | 1.742405089   | ns                     |
| miR-137-1    | 0.003552264   | 0.001748351   | -2.031779767  | ns                     |
| miR-142-5p-1 | 0.699091013   | 0.251259398   | -2.782347723  | ns                     |
| miR-145-1    | 0.690410163   | 9.250611971   | 13.3987193    | 0.0003                 |
| miR-147-1    | 0.003556245   | 0.002670476   | -1.331689229  | ns                     |
| miR-148a-1   | 2.732522406   | 13.70589859   | 5.015841245   | 0.0033                 |
| miR-148b-1   | 0.135245384   | 0.595762517   | 4.405048802   | 0.0046                 |
| miR-149*-2   | 0.074614025   | 0.016844254   | -4.429642596  | ns                     |
| miR-151-3p-1 | 0.061855721   | 0.643196576   | 10.39833601   | 0.0004                 |
| miR-154-1    | 0.004304995   | 0.036393681   | 8.453827452   | 0.0001                 |
| miR-155-1    | 0.007136333   | 0.53410415    | 74.84294473   | 0.0004                 |
| miR-181a-2   | 0.198959302   | 1.274609069   | 6.406380893   | 0.0083                 |
| miR181b-1    | 0.050262627   | 33024185.07   | 657032615.3   | 0.0001                 |

**Supplementary table 1: Continued**

| miRNA         | Normal (mean) | Tumour (Mean) | Tumour/Normal | Mann-Whitney( p value) |
|---------------|---------------|---------------|---------------|------------------------|
| miR-182-2     | 0.021711726   | 0.064718948   | 2.980829295   | ns                     |
| miR-182*-2    | 0.003673784   | 0.002242088   | -1.638554614  | ns                     |
| miR-183-1     | 0.016789092   | 0.035503858   | 2.114697959   | ns                     |
| miR-185-1     | 0.413806049   | 0.621017893   | 1.50074629    | ns                     |
| miR-187-1     | 0.014609207   | 0.009822902   | -1.48725986   | ns                     |
| miR-193b-2    | 0.540741925   | 3.762768962   | 6.958530097   | 0.0033                 |
| miR-194-1     | 3.081290825   | 17.54003896   | 5.692432152   | 0.0108                 |
| miR-196b-1    | 0.003555944   | 0.210373503   | 59.16107981   | 0.0179                 |
| miR-199a-1    | 0.286174148   | 1.390881475   | 4.860262487   | 0.0179                 |
| miR-199a-3p-1 | 0.270987375   | 3.24307083    | 11.96760856   | 0.0016                 |
| miR-200a-1    | 0.012574963   | 0.150663192   | 11.98120364   | 0.0004                 |
| miR-200b-3    | 0.048065166   | 0.567700257   | 11.81105359   | 0.0024                 |
| miR-204-1     | 0.009979174   | 0.290701023   | 29.1307707    | 0.0007                 |
| miR-210-1     | 0.093916289   | 0.714983954   | 7.612991963   | 0.0284                 |
| miR-198-2     | 0.003563696   | 0.003491736   | -1.020608544  | ns                     |
| miR-211-1     | 0.019384041   | 0.016417977   | -1.180659573  | ns                     |
| miR-215-1     | 0.032984158   | 0.143767789   | 4.358692035   | 0.0108                 |
| miR-218-1     | 0.012997207   | 0.070814628   | 5.448449476   | ns                     |
| miR-221-1     | 0.090600219   | 3.572610282   | 39.43268936   | 0.0005                 |
| miR-222-2     | 0.147849725   | 2.348173975   | 15.88216665   | 0.0083                 |
| miR-223-1     | 0.323491384   | 0.928917157   | 2.871536003   | 0.0353                 |
| miR-301b-1    | 0.007837431   | 0.041275823   | 5.266499017   | ns                     |
| miR-302b-1    | 0.003552264   | 0.006489196   | 1.82677744    | ns                     |
| miR-302b*-2   | 0.003664613   | 0.006035627   | 1.64700239    | ns                     |
| miR-324-5p-1  | 0.016350843   | 0.612598674   | 37.46587647   | <0.0001                |
| miR-325-1     | 0.003648086   | 0.002044912   | -1.783981802  | ns                     |
| miR-326-1     | 0.071401268   | 0.287875658   | 4.031800355   | 0.014                  |
| miR-328-1     | 0.050614564   | 0.413923104   | 8.177944632   | 0.0003                 |
| miR-338-1     | 0.012235863   | 0.090565992   | 7.401684259   | 0.0015                 |
| miR-340-2     | 0.004415594   | 0.004773253   | 1.080999106   | ns                     |
| miR-365-1     | 0.436159526   | 2.494133214   | 5.718396751   | 0.0115                 |
| miR-370-1     | 2.77208023    | 19.46965444   | 7.023481581   | 0.0433                 |
| miR-373*-1    | 0.0064713     | 0.014643055   | 2.262768808   | ns                     |
| miR-455-1     | 0.043922006   | 0.151516953   | 3.449681974   | 0.0108                 |
| miR-455-3p-1  | 0.313360798   | 0.966219848   | 3.083410095   | 0.0258                 |
| miR-486-3p-1  | 0.003620291   | 0.004176428   | 1.153616644   | ns                     |
| miR-491-1     | 0.003739279   | 0.013097869   | 3.502778915   | 0.0062                 |
| miR-602-2     | 0.004996373   | 0.003095047   | -1.614312636  | 0.0033                 |
| miR-638-3     | 1.45245239    | 0.479448174   | -3.029425218  | 0.0449                 |
| miR-664-1     | 0.174755992   | 2.720457874   | 15.56717941   | 0.0001                 |
| miR-888-1     | 0.00355383    | 0.001882618   | -1.887706435  | ns                     |
| miR-940-2     | 1.223357045   | 1.07232405    | -1.140846412  | ns                     |
| miR-1228*-2   | 0.010069424   | 0.005450612   | -1.847393113  | ns                     |
| miR-1246-1    | 31.81663289   | 8.454801612   | -3.763143638  | 0.0062                 |
| miR-1290-1    | 0.020147156   | 0.009294177   | -2.167718049  | ns                     |
